# Supplementary material
Source: bioRxiv or medRxiv preprint supplement (https://www.medrxiv.org/highwire/filestream/74224/field_highwire_adjunct_files/0/2020.03.23.20034058-1.pdf)

**Supplementary Figure 1. Spatiotemporal clustering of COVID-19 incident cases in stage1 (a) and stage2 (b) (including Hubei).**

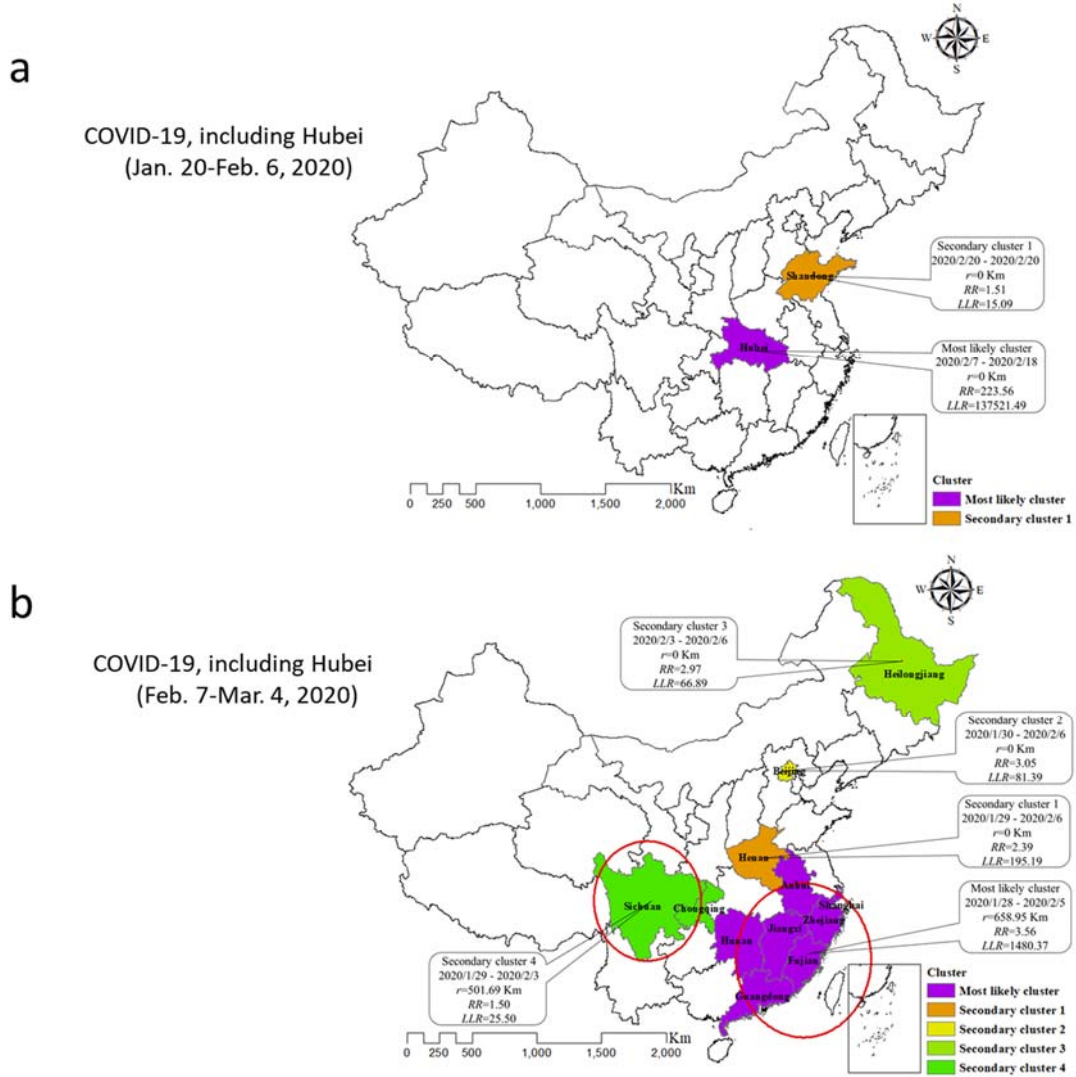

**Supplementary Figure 2. Spatiotemporal clustering of COVID-19 incident cases in stage1 (a) and stage2 (b) (excluding Hubei).**

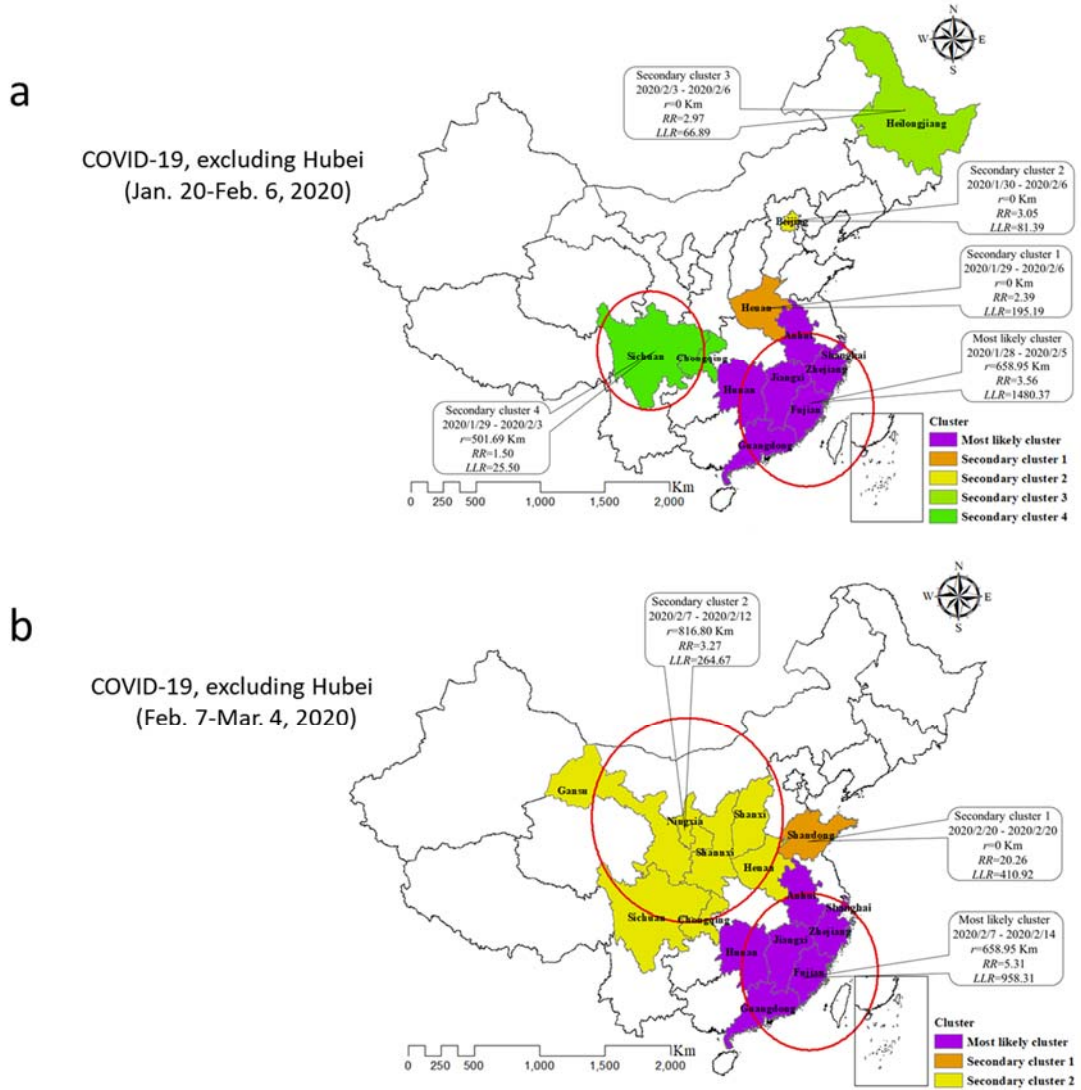

Supplement: Supplementary file [file 2020.03.23.20034058-1.pdf]
